# Supplementary material for: Cannabinoids Modulate Food Preference and Consumption in Drosophila Melanogaster
Source: Research Square preprint supplement (doi:10.21203/rs.3.rs-122761/v1), 2020-12-11
Supplement: Supplementary file 1 [file bc36b0901b0fe194b845d0c2.pdf]

# **Cannabinoids modulate food preference and consumption in *Drosophila melanogaster***

Jianzheng He<sup>1,\*</sup>, Alice Mei Xien Tan<sup>1</sup>, Si Yun Ng<sup>1</sup>, Fengwei Yu<sup>1,2,3,\*</sup>

<sup>1</sup>Temasek Life Sciences Laboratory, 1 Research Link, National University of Singapore, Singapore 117604.

<sup>2</sup>Department of Biological Sciences, National University of Singapore, Singapore 117543.

<sup>3</sup>NUS Graduate School for Integrative Sciences and Engineering, Centre for Life Sciences, Singapore 117456.

\*Corresponding authors: [jianzheng@tll.org.sg](mailto:jianzheng@tll.org.sg); [fengwei@tll.org.sg](mailto:fengwei@tll.org.sg)

Running title: Cannabinoids affects feeding behavior in flies

## Supplementary

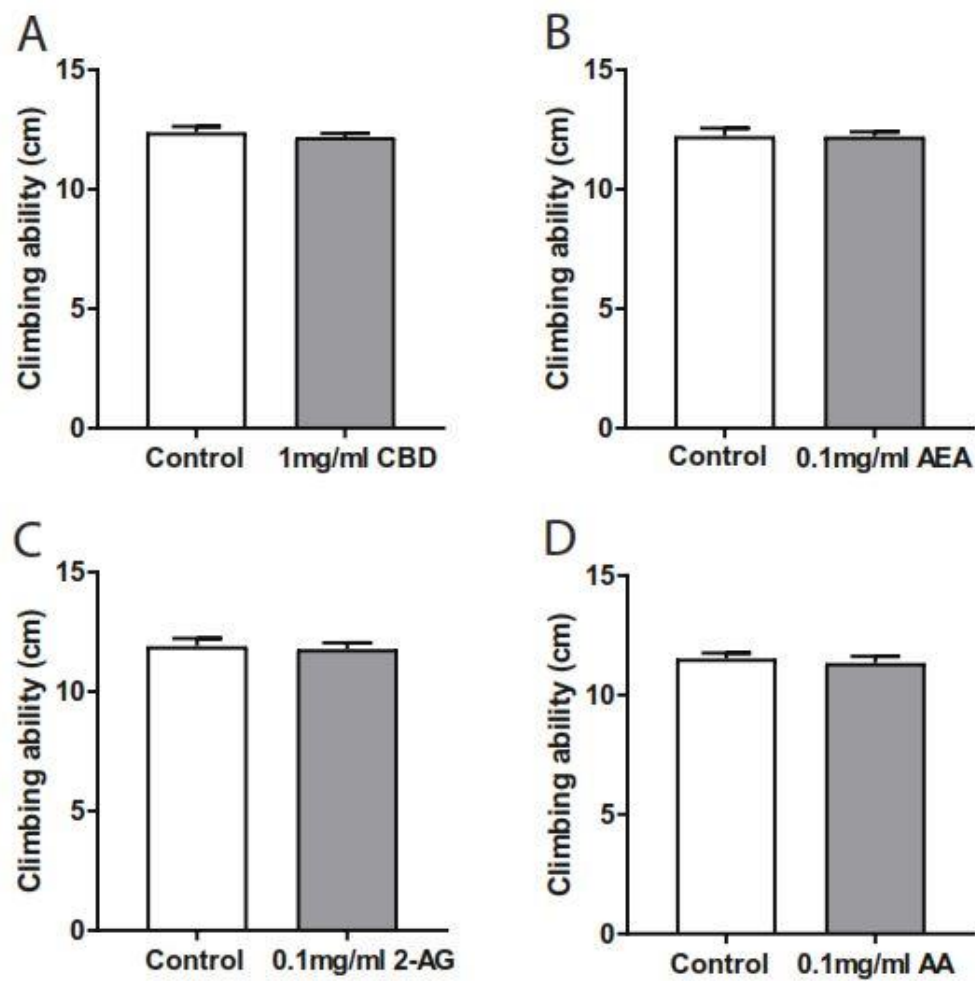

**Figure S1. No or negligible effects of cannabinoids on climbing ability of the treated flies.**

Following two days of treatment with cannabinoids, the climbing ability of the flies was assessed to determine the locomotive behavior. Pre-treatment with 1 mg/ml CBD (**A**), 0.1 mg/ml AEA (**B**), 0.1 mg/ml 2-AG (**C**), 0.1 mg/ml AA (**D**) (n=8-12 vials/group) did not alter the climbing performance. Data are represented as mean  $\pm$  S.E.M.

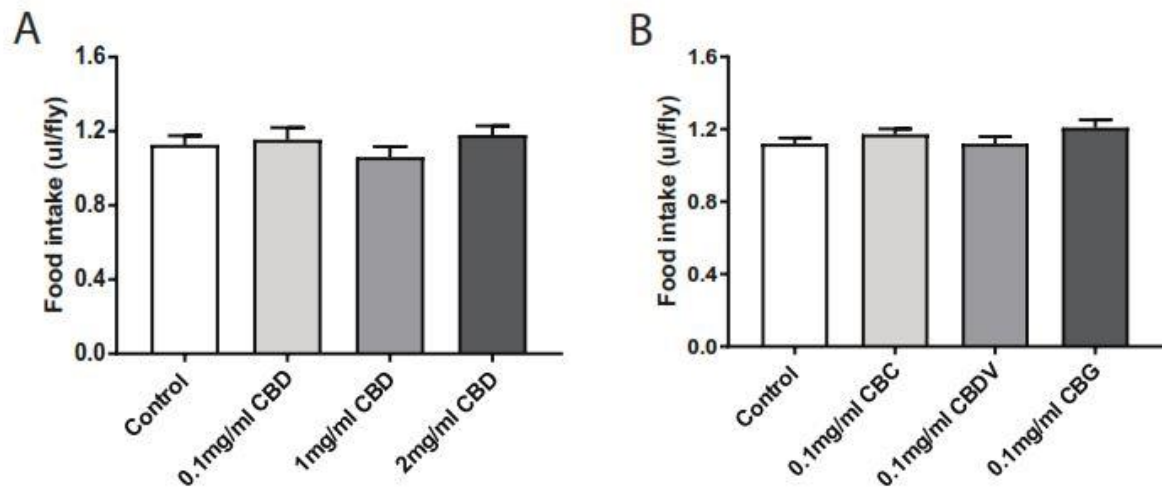

**Figure S2. Initial food intake was not altered during the phytocannabinoids training.** Flies consumed similar amounts of food containing various concentrations of CBD (0.01, 0.1 and 1 mg/ml; n=12-19 vials/group) (**A**), or CBDV, CBC or CBG (0.1 mg/ml; n=32-33 vials/group) (**B**) during two days of the training (day -2 and day -1) as compared to the respective control solutions. Data are represented as mean  $\pm$  S.E.M.

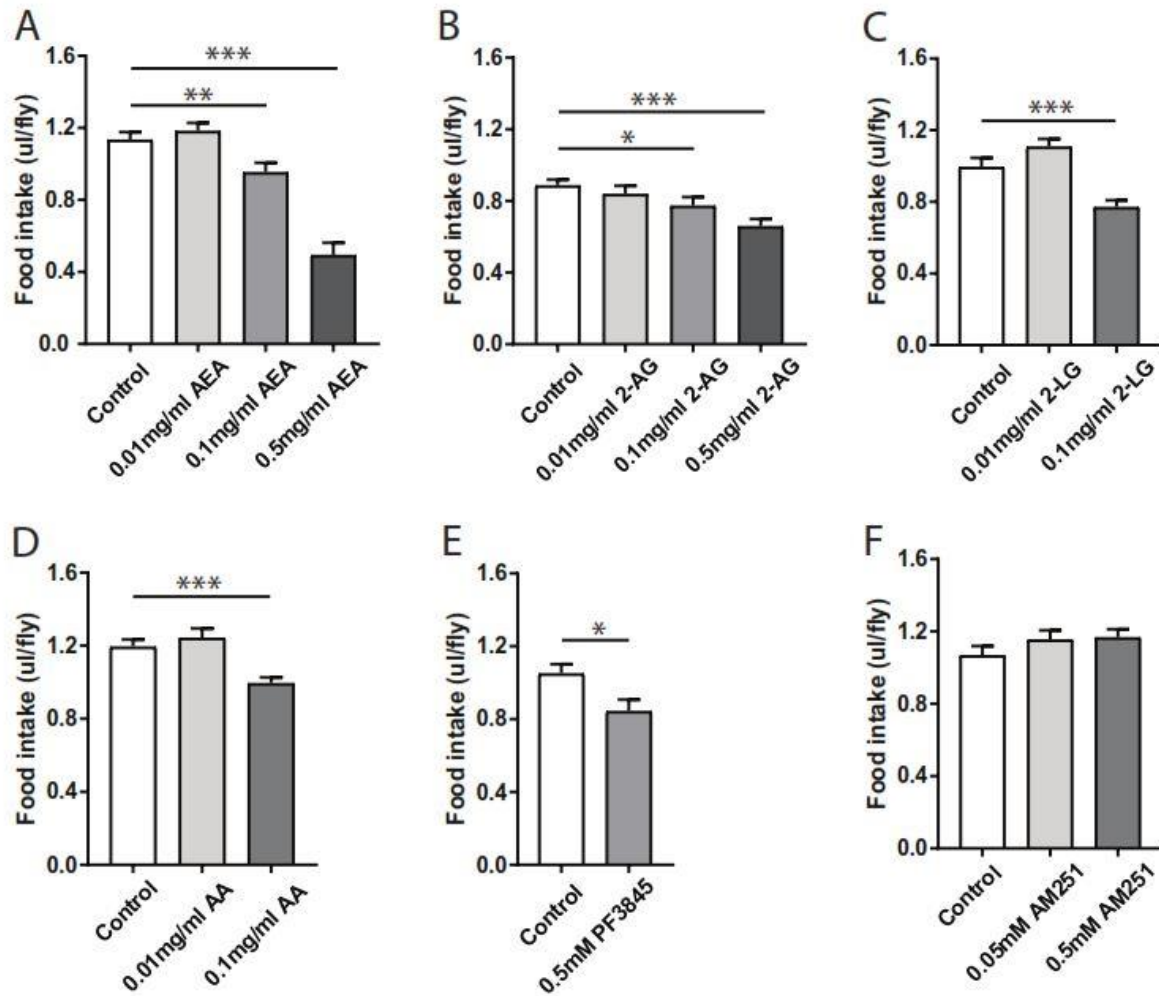

**Figure S3. Endocannabinoids-containing food intake decreased during the initial training.**

The amount of food with AEA (0.1 and 0.5 mg/ml) (A), 2-AG (0.1 and 0.5 mg/ml) (B), 2-LG (0.1 mg/ml) (C), AA (0.1 mg/ml) (D) and PF3845 (0.5 mM) (E) consumed by the flies during two days of the training (day -2 and day -1) was significantly lower when compared to the respective control solutions (n=10-27). The consumption of food with AM251 (F) by the flies did not differ from the control groups (n=18 vials/group). Data are represented as mean  $\pm$  SEM. One-way ANOVA followed by Dunnett's post-test was applied to determine statistical significance. \* $p$ <0.05, \*\* $p$ <0.01, and \*\*\* $p$ <0.001.
